# Supplementary material
Source: publisher site journal article supplement (https://www.spandidos-publications.com/3317/downloadSupplementary)
Supplement: Supplementary file 1 [file downloadSupplementary]

Figure S1. miR-106a-5p expression is upregulated in SCG. (A and B) Reverse transcription-quantitative PCR was used to analyze miR-106a-5p expression in tissue samples from 20 patients with high-grade spinal glioma, and adjacent normal spinal cord tissues were used as controls. All experiments were performed in triplicate. SCG, spinal cord glioma; NSC, normal spinal cord; miR, microRNA.

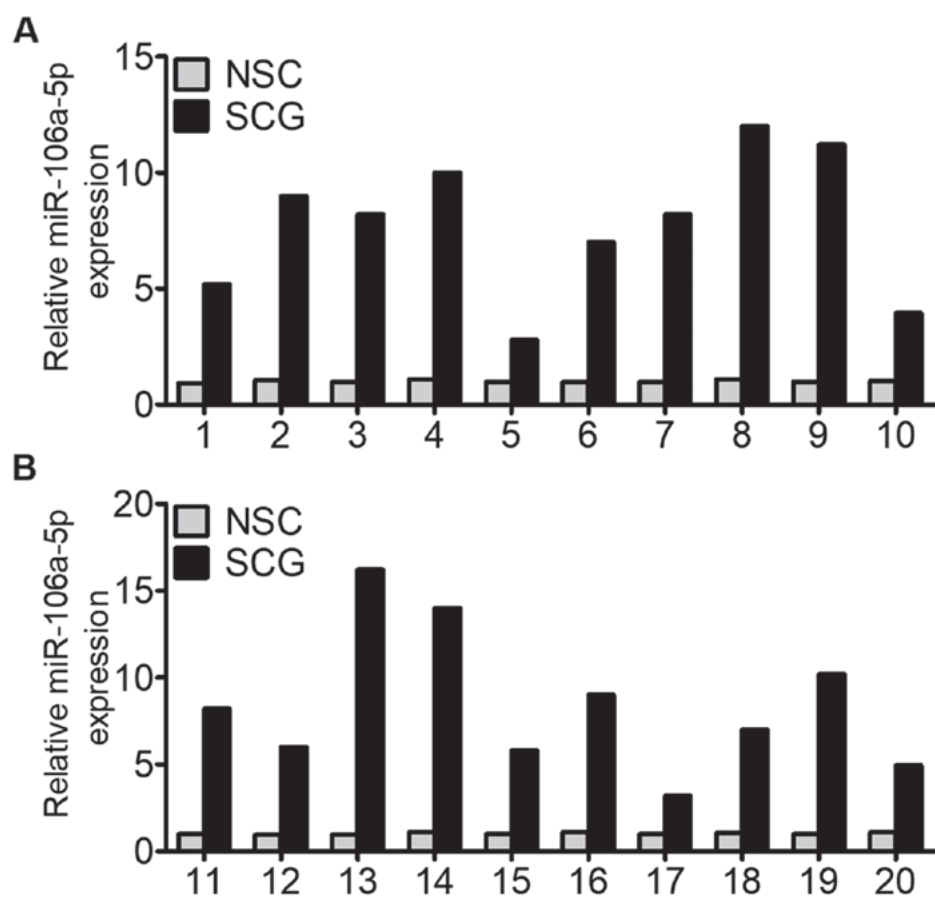

Figure S2. miR-106a-5p overexpression promotes the proliferation and inhibits the apoptosis of 0213SCG cells. Reverse transcription-quantitative PCR analysis of miR-106a-5p expression in 0213SCG cell lines transiently transfected with (A) miR-106a-5p inhibitor and (B) miR-106a-5p mimics. (C) MTT assays showed that overexpression of miR-106a-5p promoted the proliferation of 0213SCG cells. (D) Apoptosis was measured using the TUNEL assay in the Mimics, miCON and PBS groups. Scale bar, 50  $\mu$ m. Data are expressed as the mean  $\pm$  SEM. \* $P$ <0.05. All experiments were performed in triplicate. inCON, inhibitor negative control; miCON, mimics negative control; miR, microRNA; OD, optical density.

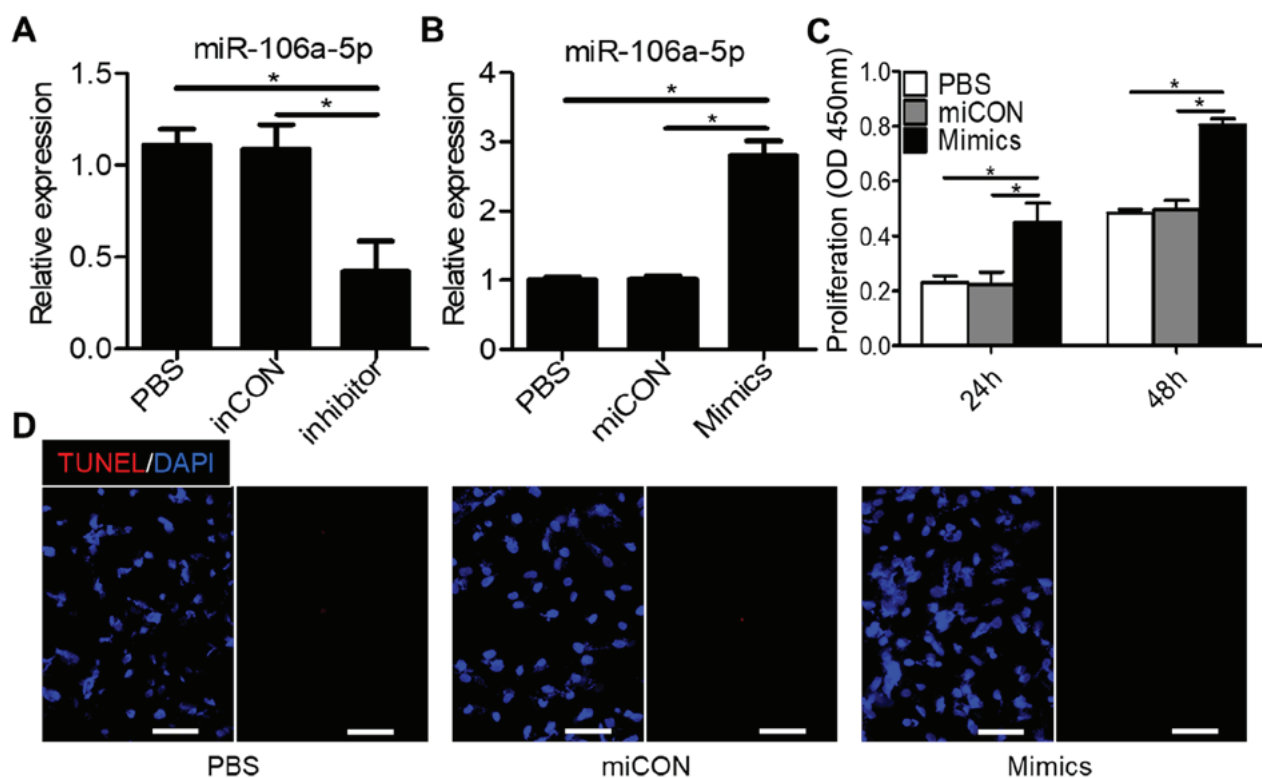

Figure S3. 3'-untranslated region sequences of 18 different species recognized by miR-106a-5p seed sequence in homology analysis obtained from TargetScan ([www.targetscan.org](http://www.targetscan.org)).

|               | ....5080.....5090.....5100.....5110.....5120.....5130.....         |
|---------------|--------------------------------------------------------------------|
| Human         | --AAGGU-AA-UUAGAU-UUAGAAGUACUC-AGUCACUUUAAGUGGAUAAAUGUAUUAGUU----- |
| Chimp         | --AAGGU-AA-UUAGAU-UUAGAAGUACUC-AGUCACUUUAAGUGGAUAAAUGUAUUAGUU----- |
| Rhesus        | --AAGGU-AA-UUAGAU-UUAGAAGUACUC-AGUCACUUUAAGUGGAUAAAUGUAUUAGUU----- |
| Squirrel      | --AAGGU-AA-UUAGAU-UUAGAAGUACUC-AGUCACUUUAAGUGGAUAAAUGUAUUAGUU----- |
| Mouse         | --AAGAU-AA-UUAGAU-UUAGAAGUACUC-AGUCACUUUAAGUGGAUAAAUGUAUUAGUU----- |
| Rat           | --AAGAU-AA-UUAGAU-UUAGAAGUACUC-AGUCACUUUAAGUGGAUAAAUGUAUUAGUU----- |
| Rabbit        | --AAGGU-AA-UUAGAC-UUAGAAGUACUC-AGUCACUUUAAGUGGAUAAAUGUAUUAGUU----- |
| Pig           | --AAGGU-AA-UUAGAU-UUAGAAGUACUCAAGUCACUUUAAGUGGAUAAAUGUAUUAGUU----- |
| Cow           | --AAGGU-AA-UUAGAU-UUAGAAGUACUC-AGUCACUUUAAGUGGAUAAAUGUAUUAGUU----- |
| Cat           | --AAGGU-AA-UUAGAU-UUAGAAGUACUC-AGUCACUUUAAGUGGAUAAAUGUAUUAGUU----- |
| Dog           | --AAGGU-AA-UUAGAU-UUAGAAGUACUC-AGUCACUUUAAGUGGAUAAAUGUAUUAGUU----- |
| Brown bat     | --AAGGU-AA-UUAGAU-UUAGAAGUACUC-AGUCACUUUAAGUGGAUAAAUGUAUUAGUU----- |
| Elephant      | --AAGGU-AAUUUAGAU-UUAGAAGUACUC-AGUCACUUUAAGUGGAUAAAUGUAUUAGUU----- |
| Opossum       | --AAGGU-AA-UUAGAA-UUAGGAGUACUC-AGUCACUUUAAGUGGAUAAAUGUAUUAGUU----- |
| Macaw         | --AAGGU-AA-UUAGAA-UUAGGAGUACUC-GGUCACUUUGCGUGGAUAAAUGUAUUAGUU----- |
| Chicken       | --AAGGU-AA-UUAGAG-UUAGGAGUACUC-AGUCACUUUGCGUGGAUAAAUGUAUUAGUU----- |
| Lizard        | IAAAUA-AA-UUAGAAUUUAGGAGUACAC-AGUCACUUUACGUGGAUAAAUGUAUUAGUU-----  |
| X. tropicalis | --AAGGU-AA-UUAGAG-UUAGGCGUACAC-AGUCACUUUAAGUGGAUAAAUGUAUUAGUA----- |

Figure S4. Overexpression of CELF-2 promotes the apoptosis of tumor cells *in vivo*. (A) Apoptosis was measured using the TUNEL assay on day 20. (B) Quantitative analysis of apoptotic cells. Data are expressed as the mean  $\pm$  SEM. \* $P < 0.05$  vs. Control. Scale bar, 50  $\mu\text{m}$ . All experiments were performed in triplicate. CELF-2, CUGBP Elav-like family member 2; OE, overexpression; GFP, green fluorescent protein.

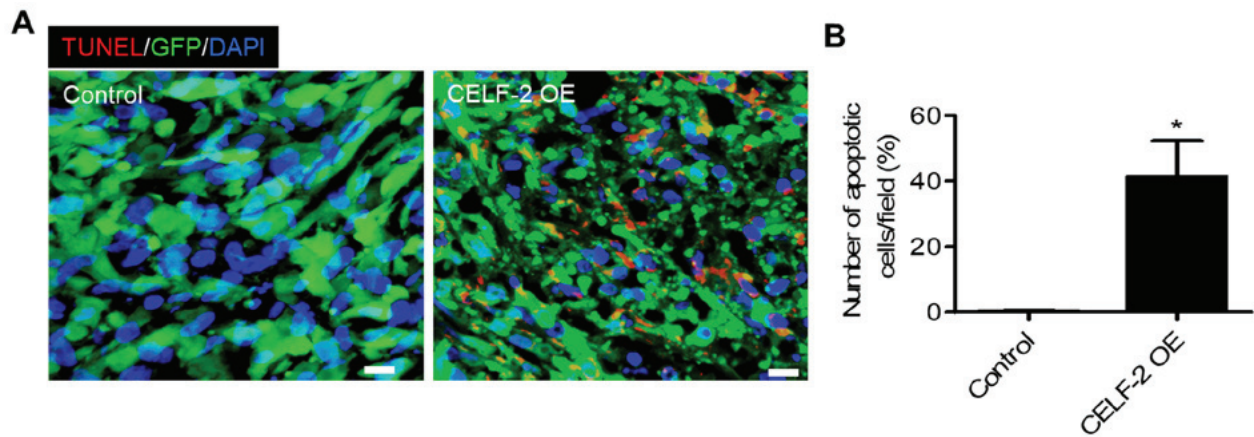

Table SI. Primers used for reverse transcription-quantitative PCR.

| Gene        | Sequence (5'-3')                                                         |
|-------------|--------------------------------------------------------------------------|
| CELF-2      | Forward: GGAATTTGGAGACCAGGACAT<br>Reverse: GCTTGGATAGCAGCTTGTGC          |
| miR-21      | Forward: GCCCGCTAGCTTATCAGACTGATG<br>Reverse: GTGCAGGGTCCGAGGT           |
| miR-10b     | Forward: GGATACCCTGTAGAACCGAA<br>Reverse: CAGTGCGTGTCTGGAGT              |
| miR-95-3p   | Forward: TGCGGTTCAACGGGTATTTATTG<br>Reverse: CCAGTGCAGGGTCCGAGGT         |
| miR-106a-5p | Forward: GATGCTCAAAAAGTGCTTACAGTGCA<br>Reverse: TATGGTTGTTCTGCTCTCTGTCTC |
| miR-615-3p  | Forward: ACACTCCAGCTGGGTCCGAGCCTGGGTCTC<br>Reverse: TGGTGTCTGTGGAGTCG    |
| miR-155     | Forward: GCGGTTAATGCTAATCGTGAT<br>Reverse: GTGCAGGGTCCGAGGT              |
| U6          | Forward: GCTTCGGCAGCACATATACTAAAAT<br>Reverse: CGCTTCACGAATTTGCGTGTTCAT  |
| GAPDH       | Forward: AATGGGCAGCCGTTAGGAAA<br>Reverse: GCGCCCAATACGACCAAATC           |

miR, microRNA; CELF-2, CUGBP Elav-like family member 2.

Table SII. Details of the spinal cord tissue samples from patients.

| Sample no.    | Age, years | Sex    | Range of dates of patient enrolment | Approval no. |
|---------------|------------|--------|-------------------------------------|--------------|
| Patient 02-01 | 56         | Male   | 19/02/2017-06/03/2017               | 2017AA02A190 |
| Patient 02-02 | 60         | Female | 25/02/2017-20/03/2017               | 2017AA02A250 |
| Patient 02-03 | 47         | Male   | 26/03/2017-09/04/2017               | 2017AA03A260 |
| Patient 02-04 | 55         | Male   | 15/04/2017-26/04/2017               | 2017AA04A150 |
| Patient 02-05 | 43         | Male   | 20/04/2017-30/04/2017               | 2017AA04A200 |
| Patient 02-06 | 41         | Female | 21/04/2017-10/05/2017               | 2017AA04A210 |
| Patient 02-07 | 52         | Male   | 04/05/2017-30/05/2017               | 2017AA04A050 |
| Patient 02-08 | 39         | Male   | 28/05/2017-11/06/2017               | 2017AA05A280 |
| Patient 02-09 | 28         | Female | 30/05/2017-01/07/2017               | 2017AA05A300 |
| Patient 02-10 | 50         | Male   | 11/06/2017-22/06/2017               | 2017AA06A110 |
| Patient 02-11 | 32         | Male   | 25/06/2017-04/07/2017               | 2017AA06A250 |
| Patient 02-12 | 16         | Female | 13/07/2017-29/07/2017               | 2017AA07A130 |
| Patient 02-13 | 38         | Male   | 15/07/2017-03/08/2017               | 2017AA07A150 |
| Patient 02-14 | 41         | Male   | 21/08/2017-12/09/2017               | 2017AA08A210 |
| Patient 02-15 | 57         | Male   | 17/09/2017-30/09/2017               | 2017AA09A170 |
| Patient 02-16 | 46         | Male   | 24/09/2017-12/10/2017               | 2017AA09A240 |
| Patient 02-17 | 19         | Male   | 11/10/2017-28/10/2017               | 2017AA10A110 |
| Patient 02-18 | 29         | Female | 20/11/2017-24/12/2017               | 2017AA11A200 |
| Patient 02-19 | 58         | Male   | 12/12/2017-27/12/2017               | 2017AA12A120 |
| Patient 02-20 | 55         | Male   | 06/01/2018-23/01/2018               | 2018AA01A060 |
| Patient 02-21 | 47         | Female | 18/01/2018-07/02/2018               | 2018AA01A180 |
